# Supplementary material for: Feasibility of outpatient total hip and knee arthroplasty in unselected patients: A prospective 2-center study
Source: PubMed Central journal article supplement — Acta Orthop. 2017 Apr 20;88(5):516–21. doi: 10.1080/17453674.2017.1314158 (PMC5560215; doi:10.1080/17453674.2017.1314158), 2017-04-20
Supplement: IORT_A_1314158_SM3872.pdf [file IORT_A_1314158_SM3872.pdf]

## Supplementary data

**Table 2. Screened patients and patients excluded from participating in outpatient surgery at both hospital**

|                                                      | Vejle<br>Hospital | Hvidovre<br>Hospital | p-value |
|------------------------------------------------------|-------------------|----------------------|---------|
| Included in outpatient surgery, n (%) <sup>a</sup>   | 94 (45)           | 208 (60)             |         |
| Excluded from outpatient surgery, n (%) <sup>a</sup> | 115 (55)          | 140 (40)             | < 0.001 |
| ASA > 3, n (%) <sup>b</sup>                          | 43 (37)           | 74 (53)              | 0.01    |
| Selected n (%) <sup>b</sup>                          | 15 (13)           | 7 (5)                | 0.02    |
| Third in the operating room, n (%) <sup>b</sup>      | 44 (38)           | 47 (34)              | 0.4     |
| Sleep apnea requiring treatment, n (%) <sup>b</sup>  | 4 (3)             | 7 (5)                | 0.5     |
| Other, n (%) <sup>b</sup>                            | 9 (8)             | 5 (4)                | 0.1     |
| Total screened, n                                    | 209               | 348                  |         |

<sup>a</sup> Percentage of all screened patients.

<sup>b</sup> Percentage of excluded patients.

**Table 3. Reasons for not being discharged on DOS, for THA and TKA patients. Values are number of patients (percentage) not fulfilling the specific discharge criterion**

| Discharge criteria                                                | THA     | TKA     |
|-------------------------------------------------------------------|---------|---------|
| < 500 mL intraoperative blood loss                                | 23 (27) | 2 (3)   |
| Back in patient ward before 3 p.m.                                | 19 (22) | 8 (13)  |
| Received instruction from physiotherapist and is safely mobilized | 51 (59) | 34 (54) |
| No clinical symptoms of anemia                                    | 14 (16) | 9 (14)  |
| Pain < 3 while resting, < 5 during exercise.                      | 24 (28) | 12 (19) |
| Spontaneous urination                                             | 2 (2)   | 3 (5)   |
| Postoperative radiograph is performed and approved                | 19 (22) | 13 (21) |
| Motivated and accepts same-day discharge <sup>a</sup>             | 65 (76) | 37 (59) |
| Standard discharge criteria fulfilled <sup>b</sup>                | 75 (87) | 50 (79) |

<sup>a</sup> No patients were not discharged due to lack of motivation alone.

<sup>b</sup> Standard discharge criteria were: ability to get dressed independently, ability to get in and out of bed, ability to sit and rise from a chair/toilet, independence in personal care, mobilization with walker/crutches, and ability to walk > 70 m with crutches.
